# Supplementary material
Source: PubMed Central journal article supplement (PMC3346344)
Supplement: supp_19.5.659_CVI-CVI00070-12-s01.pdf [file supp_19.5.659_CVI-CVI00070-12-s01.pdf]

## Supplemental Material

**Table S1**

Comparison of the serum bactericidal titers of mice and rabbits immunized with the experimental trivalent NOMV vaccine.

| Bactericidal Target Strain | Serogroup | rabbit 1<br>75µg dose | rabbit 2<br>75µg dose | rabbit 3<br>75µg dose | rabbit 4<br>75µg dose | pooled mice sera |           |            |
|----------------------------|-----------|-----------------------|-----------------------|-----------------------|-----------------------|------------------|-----------|------------|
|                            |           |                       |                       |                       |                       | 3 µg dose        | 9 µg dose | 18 µg dose |
| H44/76                     | B         | 128                   | 128                   | 256                   | 256                   | 512              | >512      | >512       |
| 8570                       | B         | 64                    | 64                    | 128                   | 64                    | 512              | >512      | >512       |
| B16B6                      | B         | 16                    | 32                    | 16                    | 8                     | >512             | >512      | >512       |
| 8991                       | A         | 16                    | 16                    | 16                    | 16                    | 16               | 256       | 512        |
| 5660                       | C         | 64                    | 128                   | 256                   | 64                    | 128              | 256       | 512        |
| 8122                       | W135      | 128                   | 128                   | 128                   | 128                   | 512              | 512       | 512        |
| 6972                       | Y         | 8                     | 8                     | 4                     | 2                     | 512              | 512       | 512        |
| 9557                       | X         | 16                    | 32                    | 32                    | 64                    | 64               | 128       | 128        |

CD-1 mice and New Zealand rabbits were immunized with trivalent NOMV on days 0, 28 and 56. The animals were bled on day 70, and the sera of individual rabbits and the pooled mouse sera were tested for bactericidal activity with human complement against *N. meningitidis* target strains. The data are reciprocal titers.

## Supplemental material

Figure S1: Purified proteins used in the bacterial depletion study

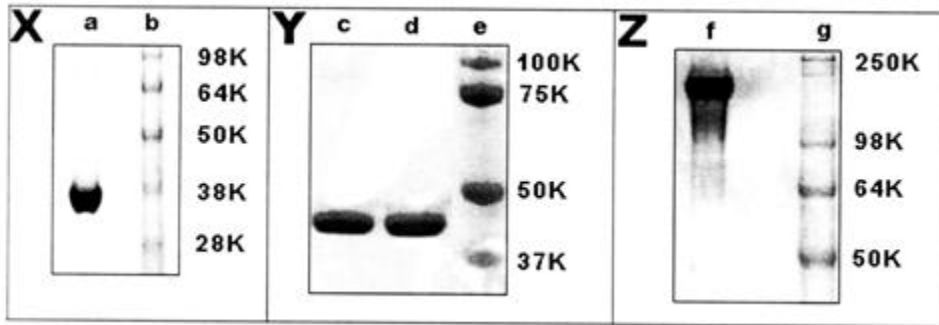

The purified proteins were run on three separate 10% SDS-PAGE gels (shown in panels X, Y and Z) and then stained with Coomassie Blue. Lanes **b**, **e** and **g** contain the molecular weight markers. Lane **a** contains purified fHbp1.1, lanes **c** and **d** contains purified P1.5, 2 and P1.19,15 PorAs respectively, and lane **f** contains purified NadA (oligomer). The proteins were verified by western blot using mAbs for PorAs, and fHbp1.1, and polyclonal antibody to NadA
